# Supplementary material for: Photoluminescent bimetallic-3-hydroxypicolinate/graphene oxide nanocomposite
Source: Royal Society of Chemistry journal article supplement (doi:10.1039/c2ra21388e), 2012-01-01
Supplement: c2ra21388e.pdf [file c2ra21388e.pdf]

## Photoluminescent bimetallic-3-hydroxypicolinate/graphene oxide nanocomposite

C.M. Granadeiro, S.M.A. Cruz, G. Gonçalves, P.A.A.P. Marques, P.M.F.J. Costa, R.A.S. Ferreira,  
L.D. Carlos and H.I.S. Nogueira\*

### Supplementary information

**Table S1.** Room-temperature  $^5D_0$  lifetime values of  $\text{Na}_5[\text{EuW}_2\text{O}_6(\text{picOH})_8]$  (**1**) and **1**/GO monitored within the  $^5D_0 \rightarrow ^7F_2$  excited at distinct excitation wavelengths ( $\lambda_{\text{ex}}$ , nm). The lifetime values acquired at 10 K are shown in parentheses.

|              | $\lambda_{\text{ex}}$        |                              |                              |                              |
|--------------|------------------------------|------------------------------|------------------------------|------------------------------|
|              | 254                          | 305 (285)                    | 355                          | 464                          |
| <b>1</b> /GO | 0.544±0.005<br>(0.796±0.006) | 0.551±0.009<br>(0.853±0.005) | 0.520±0.007<br>(0.793±0.008) | 0.407±0.027<br>(0.648±0.018) |
| <b>1</b>     | -                            | 0.880±0.004                  | 0.834±0.005                  | 0.771±0.009                  |

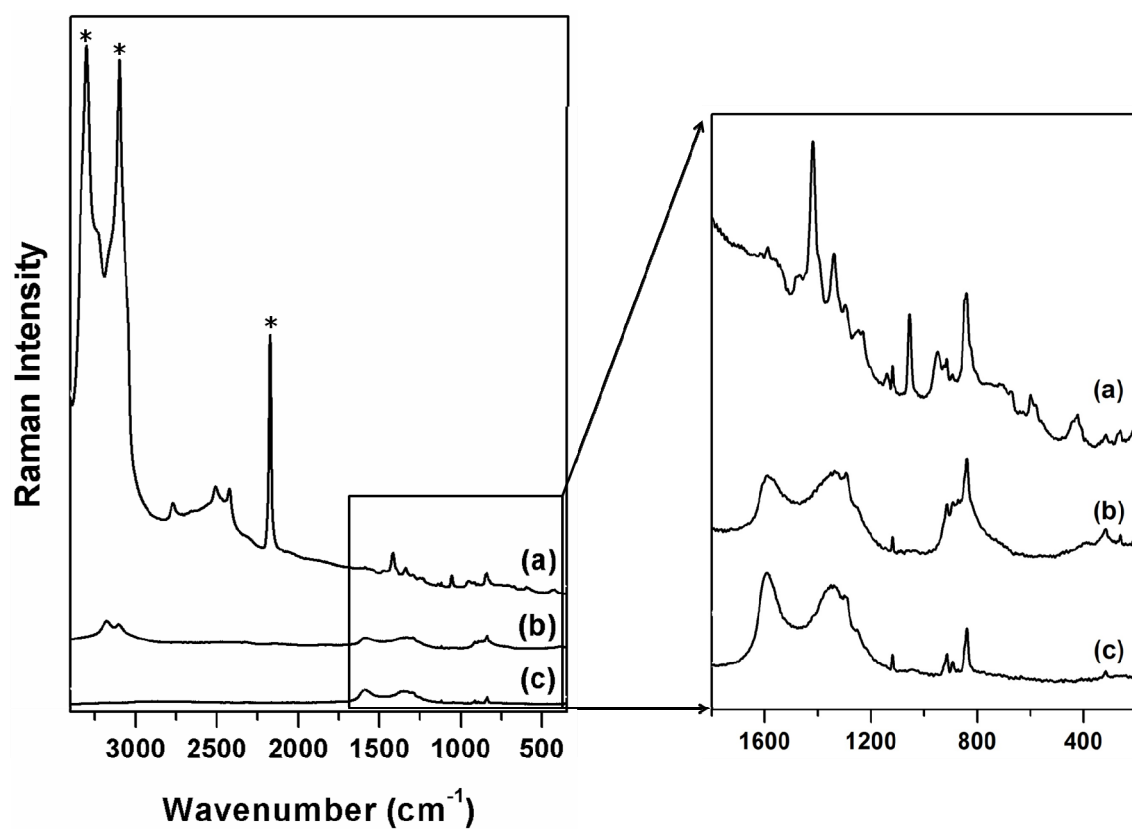

**Figure S1.** Raman spectra (514 nm laser) of (a)  $\text{Na}_5[\text{EuW}_2\text{O}_6(\text{picOH})_8]$  (1), (b) 1/GO composite and (c) graphene oxide.

\* Indicates the signals from europium(III) emission.

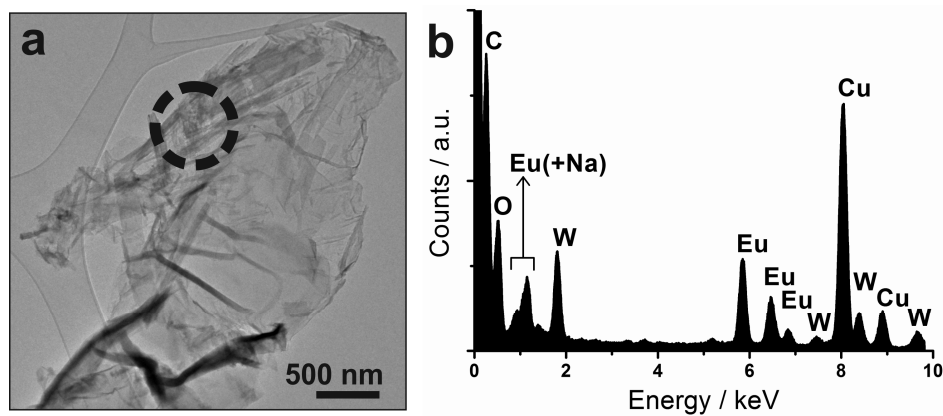

**Figure S2.** (a) TEM image of **1**/GO composite. (b) EDX spectrum of the composite taken from the region circled in (a) and showing the presence of the various elements that make up the compound  $\text{Na}_5[\text{EuW}_2\text{O}_6(\text{picOH})_8]$  (**1**) and the GO. The presence of C, O, W and Eu was identified, and the Na signal was also present but it was masked by the set of Eu(M) peaks (see 0.5-1.5 keV region).

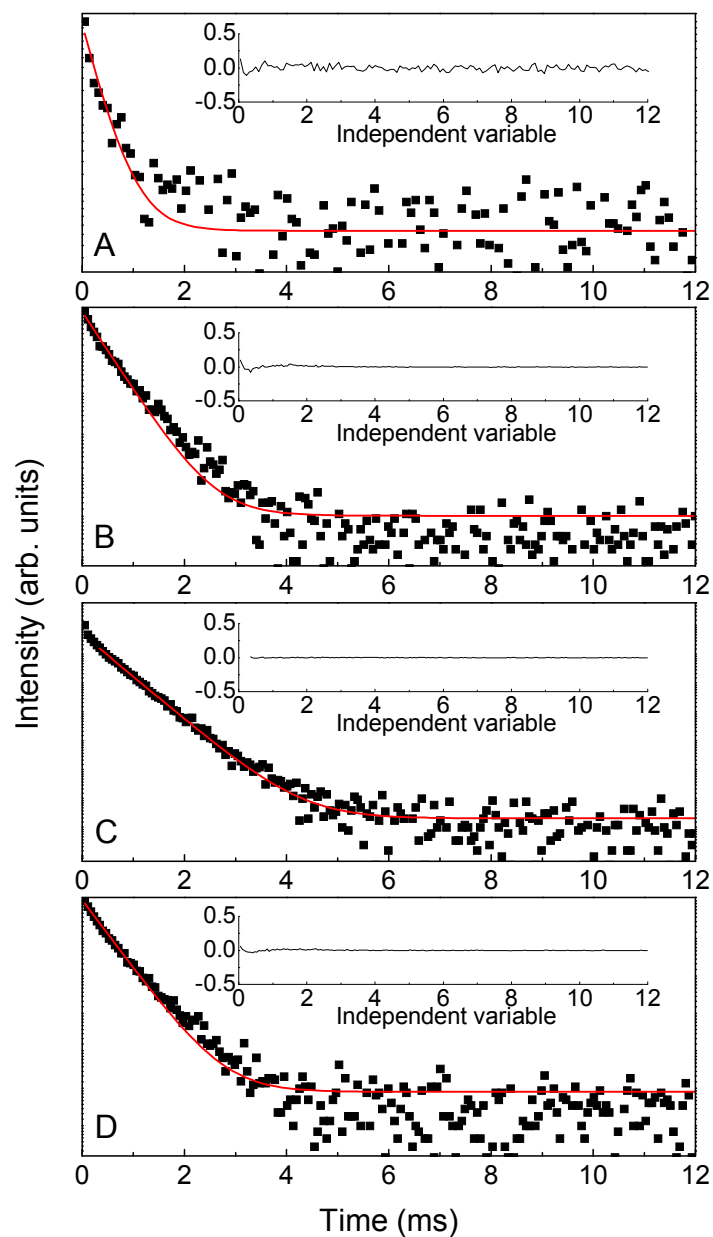

**Figure S3.** Emission decay curves acquired at room-temperature monitored within the  ${}^5D_0 \rightarrow {}^7F_2$  transition of 1/GO composite excited at (A) 465 nm, (B) 355 nm, (C) 305 nm and (D) 254 nm. The solid lines represent data best fit using a single exponential function. The insets show the respective regular residual plots for a better judgment of the fit quality.

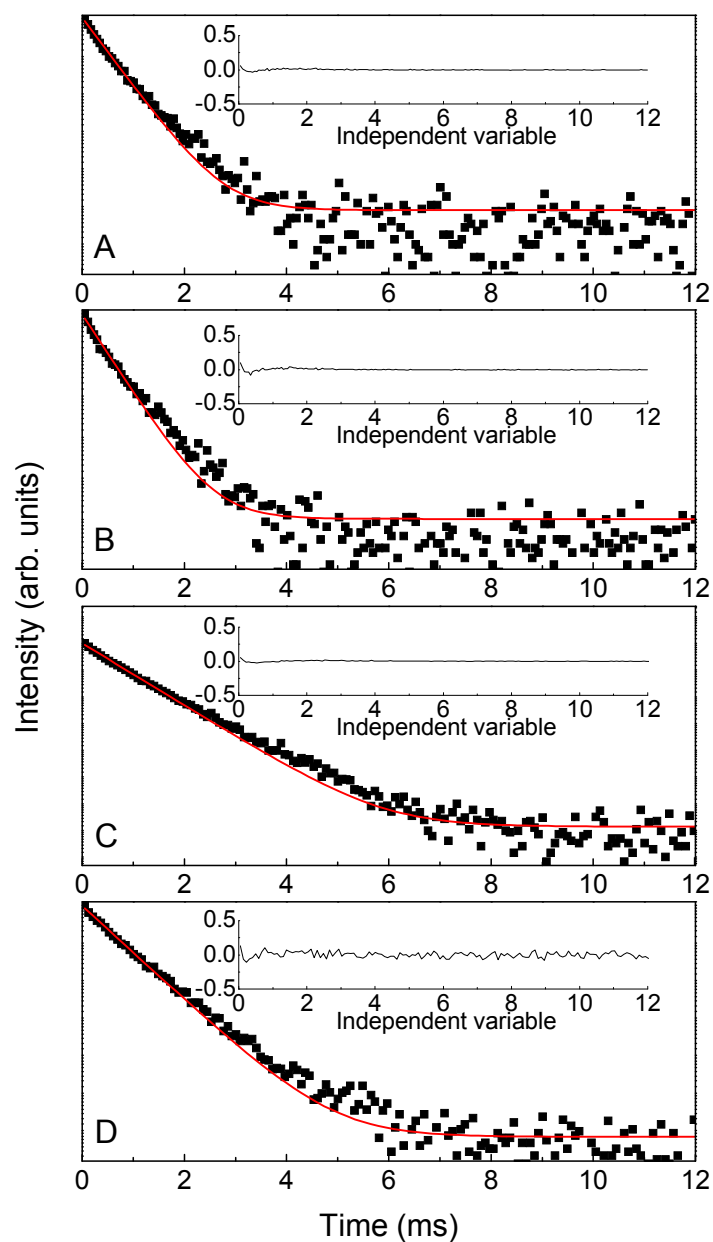

**Figure S4.** Emission decay curves acquired at 10 K monitored within the  ${}^5D_0 \rightarrow {}^7F_2$  transition of 1/GO composite excited at (A) 465 nm, (B) 355 nm, (C) 285 nm and (D) 254 nm. The solid lines represent data best fit using a single exponential function. The insets show the respective regular residual plots for a better judgment of the fit quality.

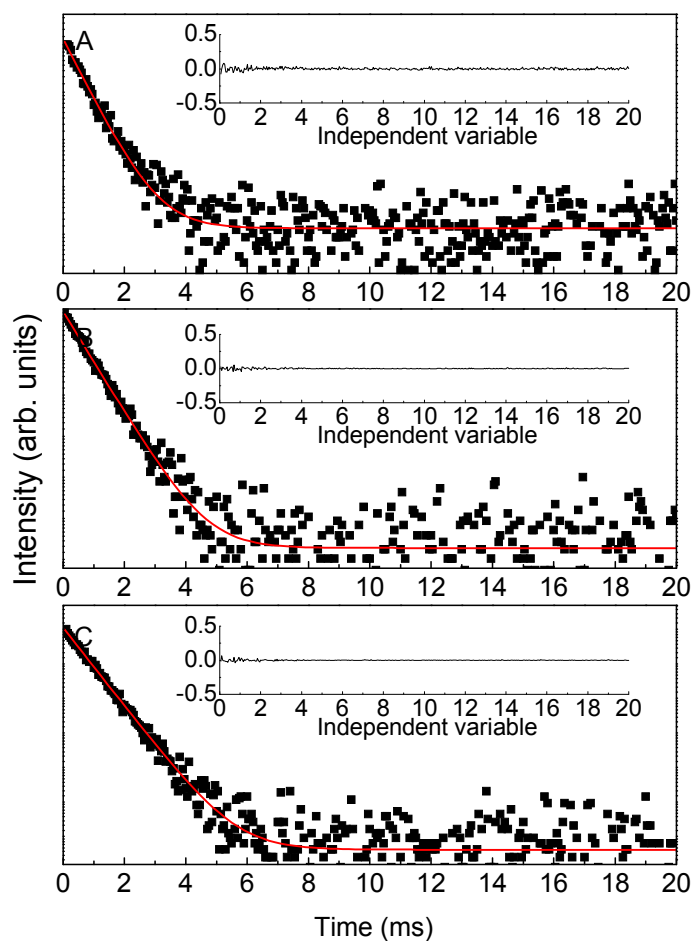

**Figure S5.** Emission decay curves acquired at room-temperature monitored within the  ${}^5D_0 \rightarrow {}^7F_2$  transition of  $\text{Na}_5[\text{EuW}_2\text{O}_6(\text{picOH})_8]$  (**1**) excited at (A) 465 nm, (B) 355 nm and (C) 305 nm. The solid lines represent data best fit using a single exponential function. The insets show the respective regular residual plots for a better judgment of the fit quality.
